# Supplementary material
Source: publisher figshare collection journal article supplement (https://acs.figshare.com/ndownloader/files/11981321)
Supplement: Supplementary file 1 [file 11981321]

## **Supporting Information**

### **Decoding Allosteric Communication Pathways in Cyclophilin A with a Comparative Analysis of Perturbed Conformational Ensembles**

Isela Rodriguez-Bussey, Xin-Qiu Yao, Abdullah Danish Shouaib, Jonathan Lopez,

Donald Hamelberg\*

Department of Chemistry, Georgia State University, Atlanta, Georgia 30303-2515, USA.

\*Corresponding to: Prof. Donald Hamelberg; Department of Chemistry, Georgia State  
University, 29 Peachtree Center Ave NE, Atlanta, Georgia 30302-3965, USA.

Telephone: (404) 413-5564; E-mail: dhamelberg@gsu.edu.

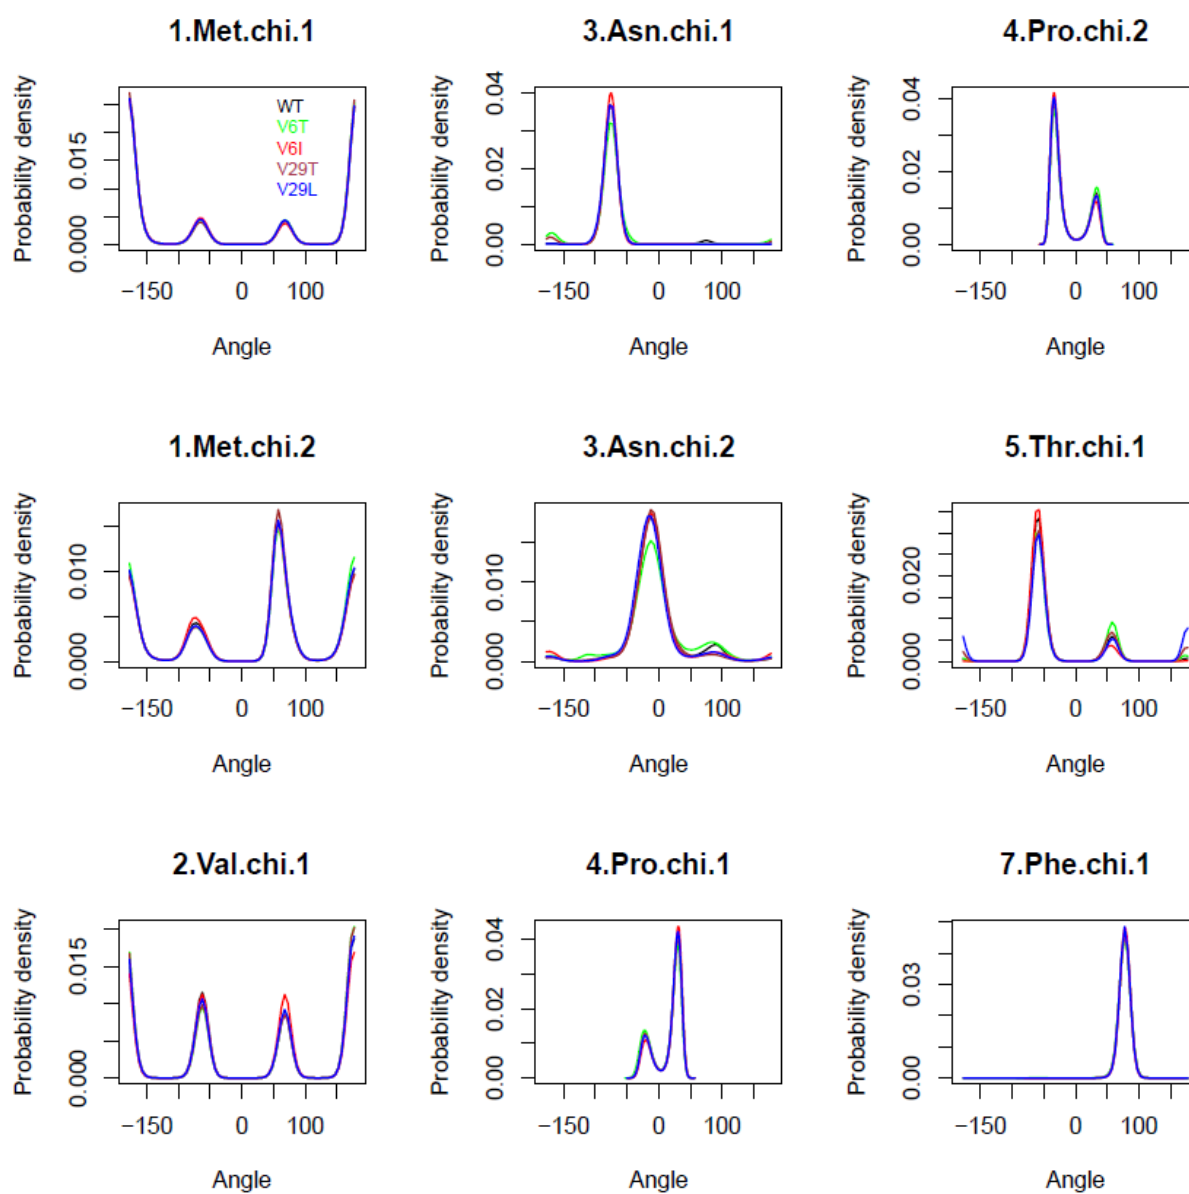

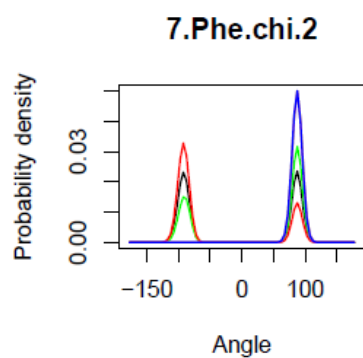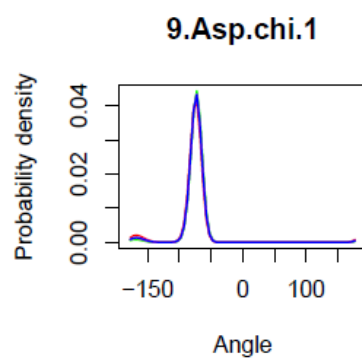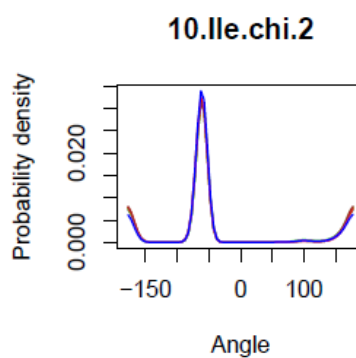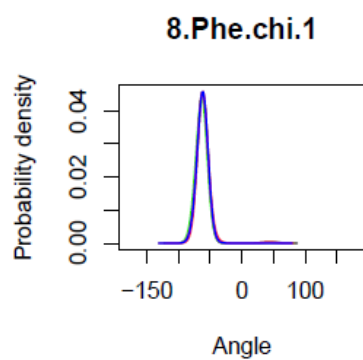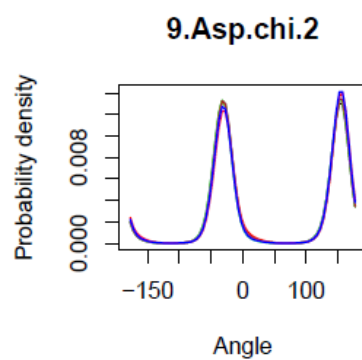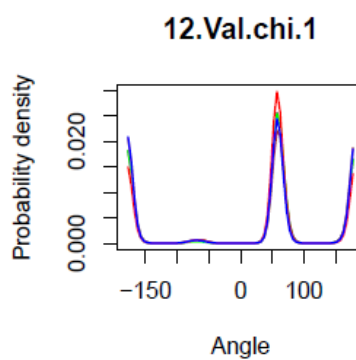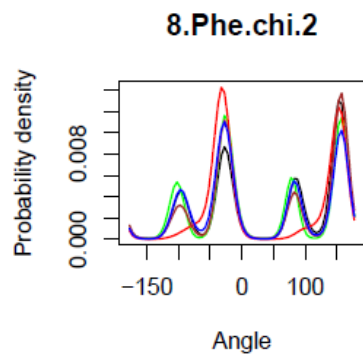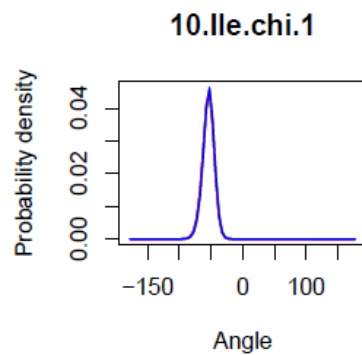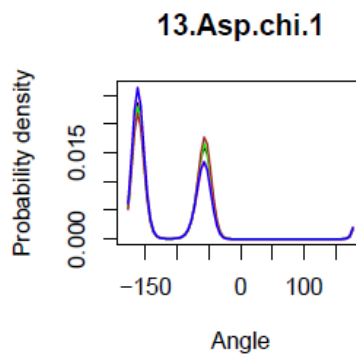

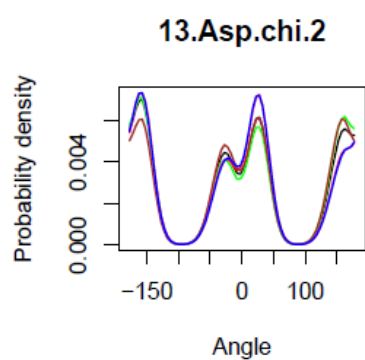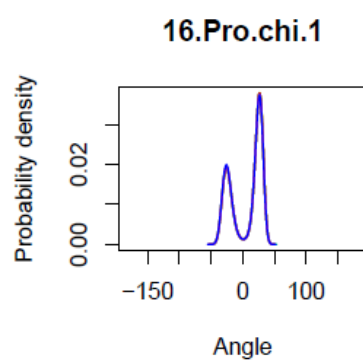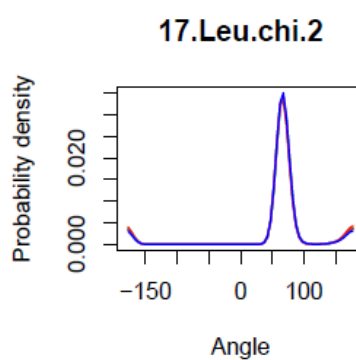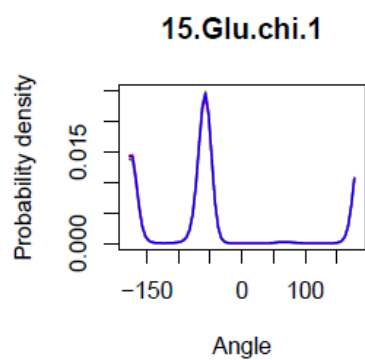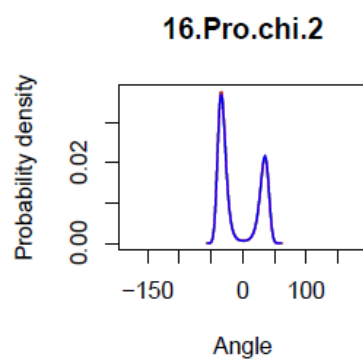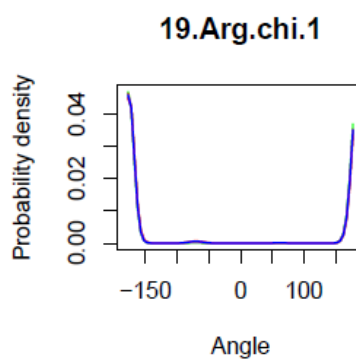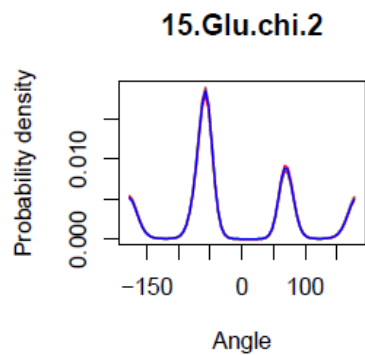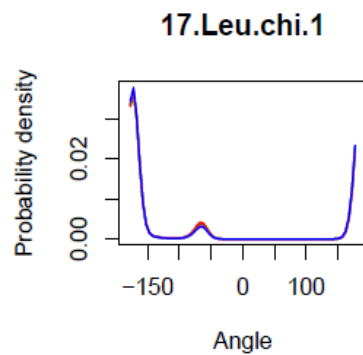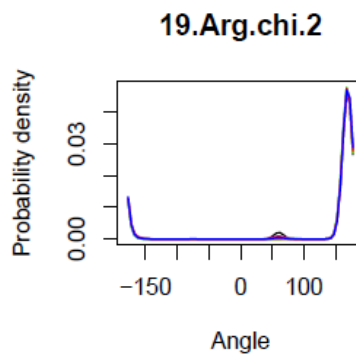

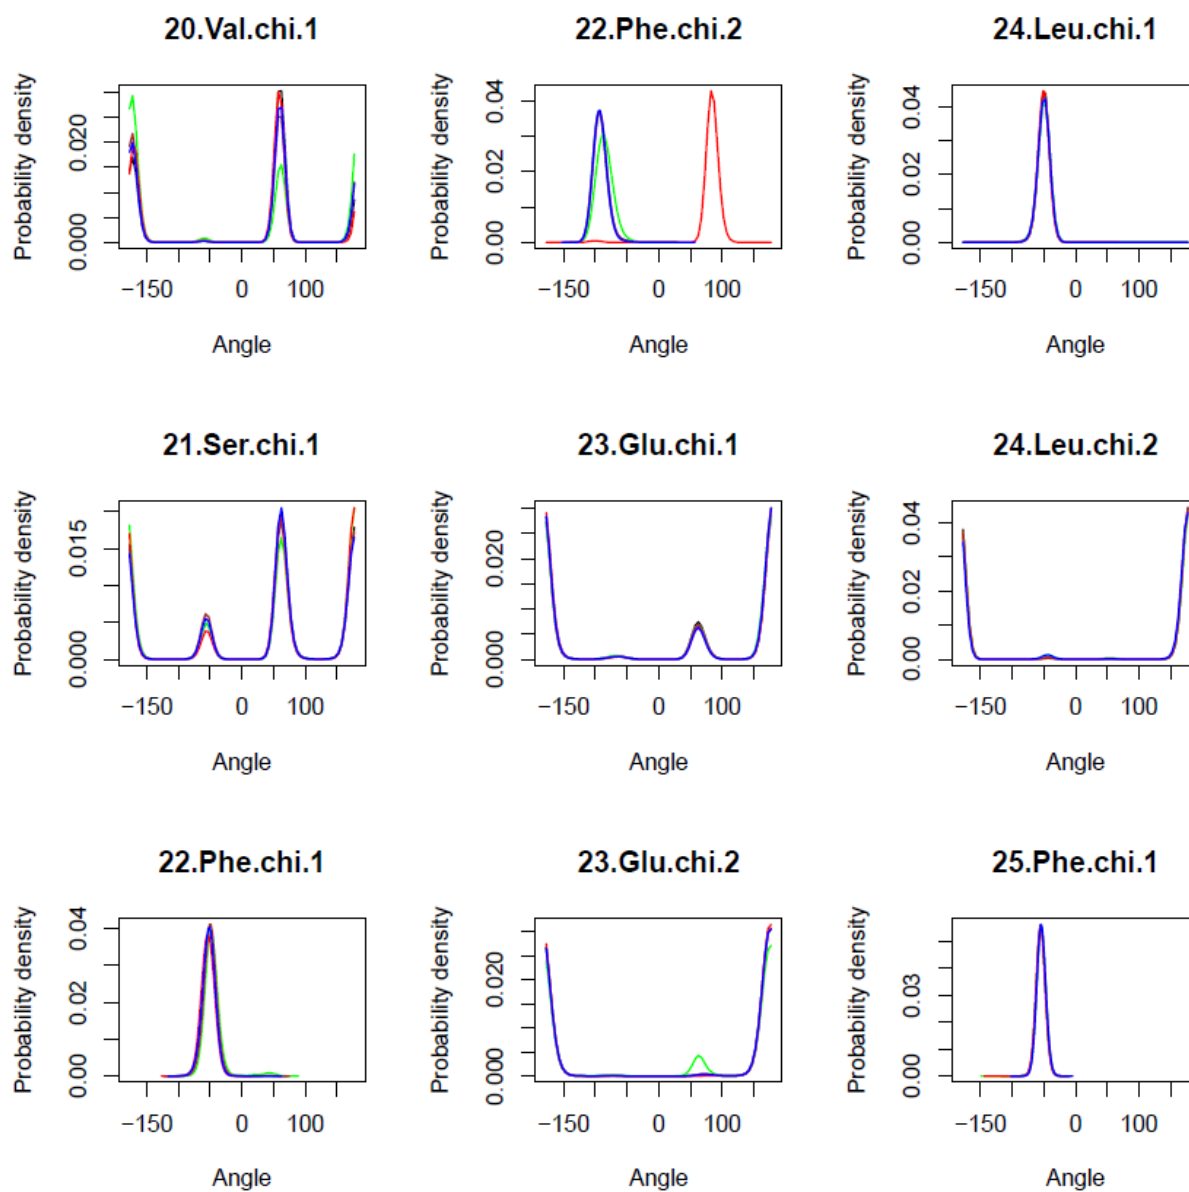

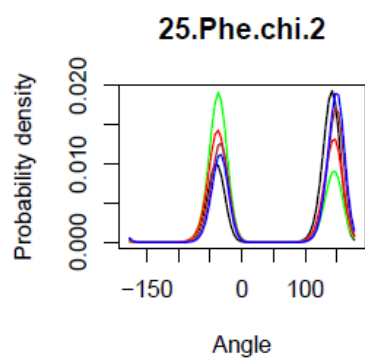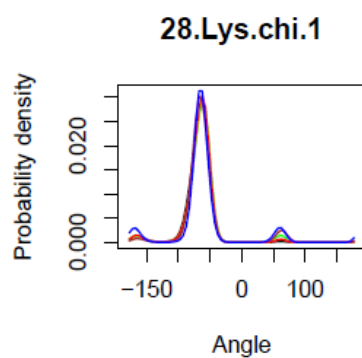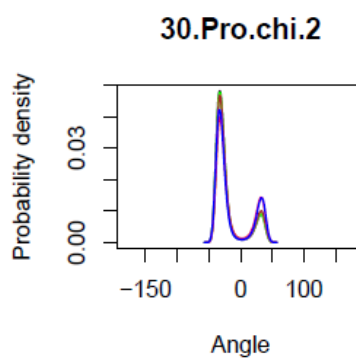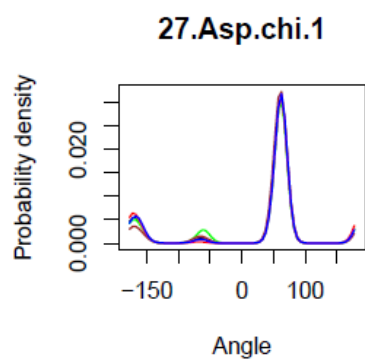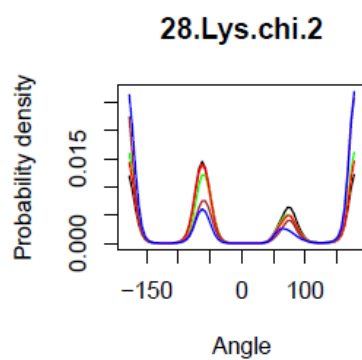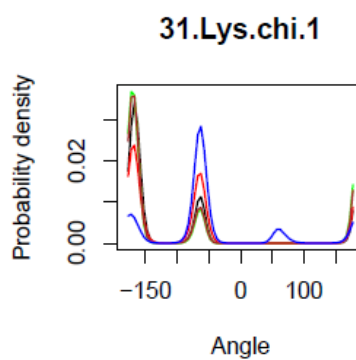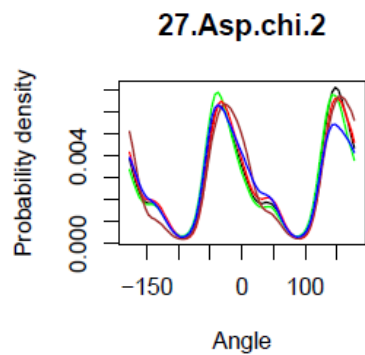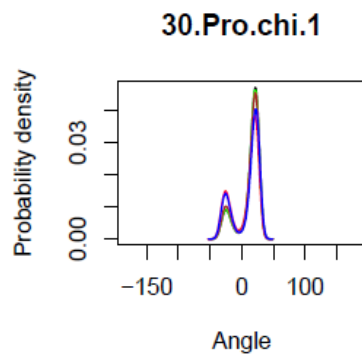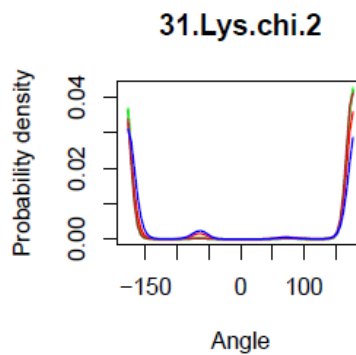

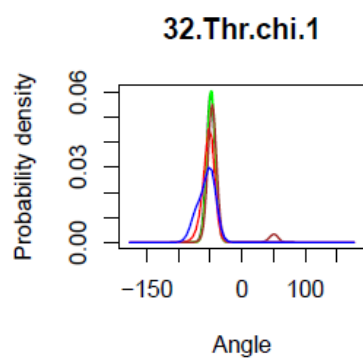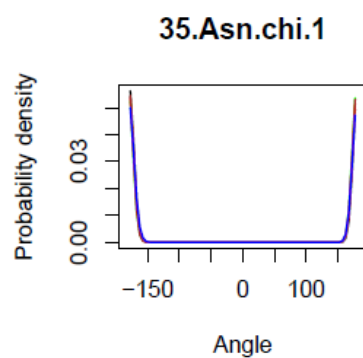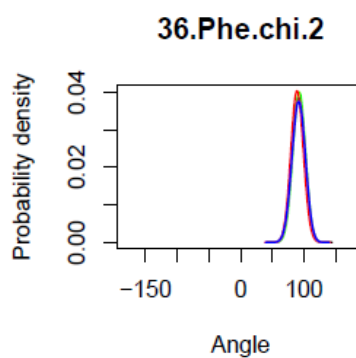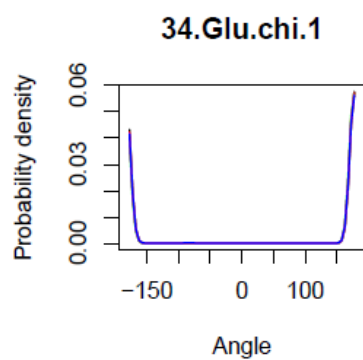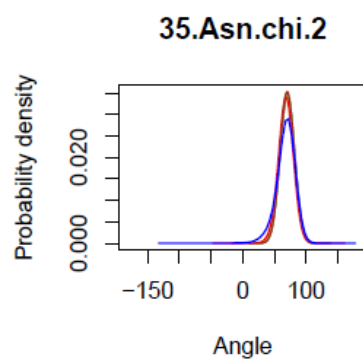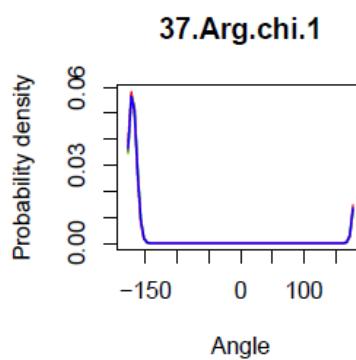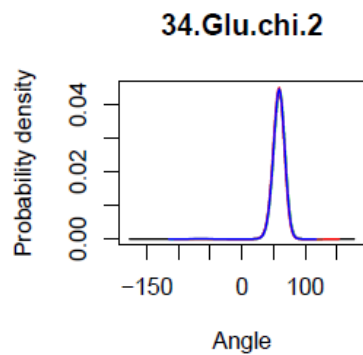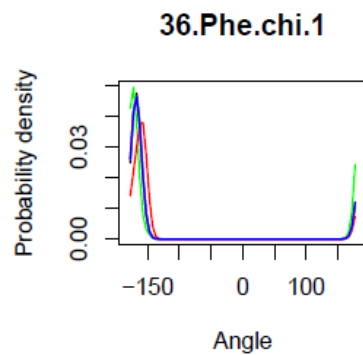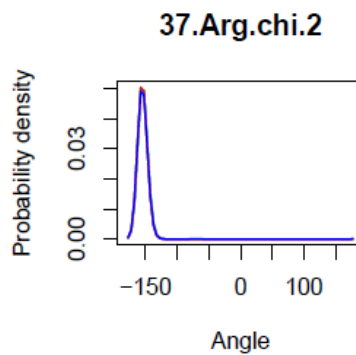

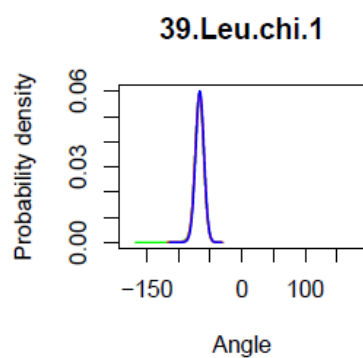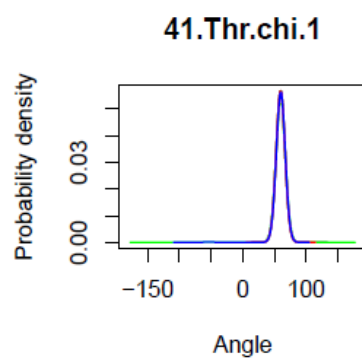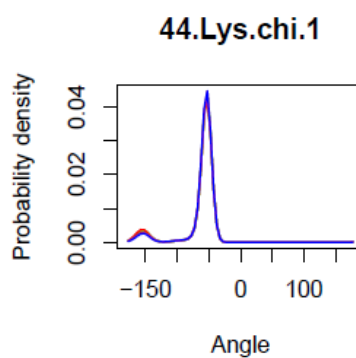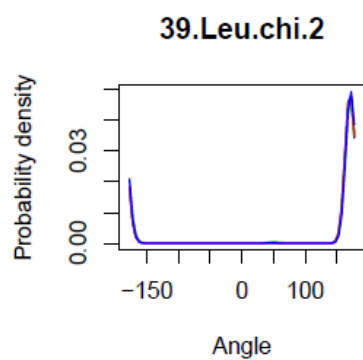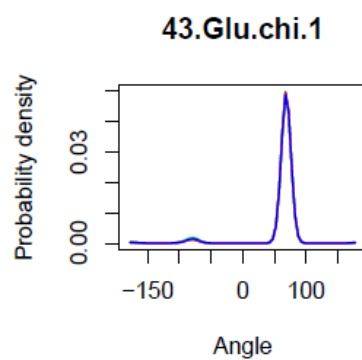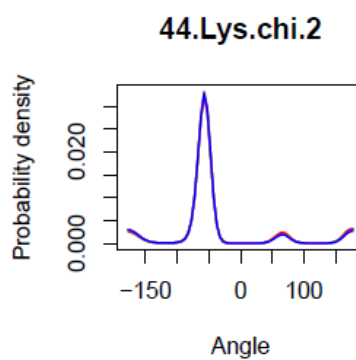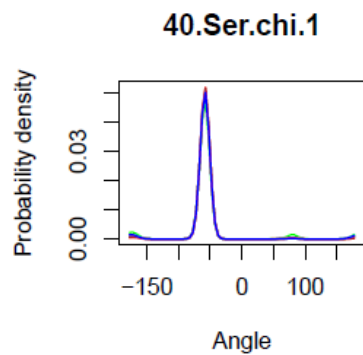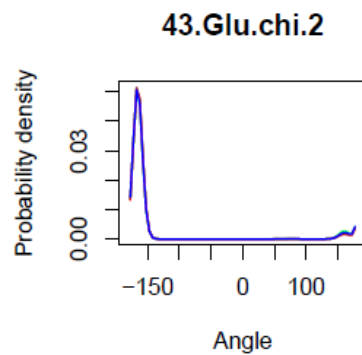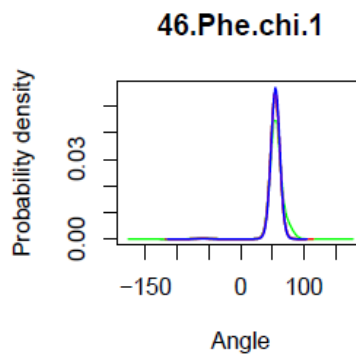



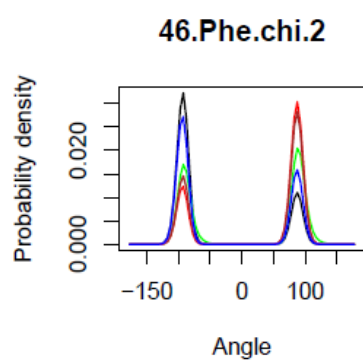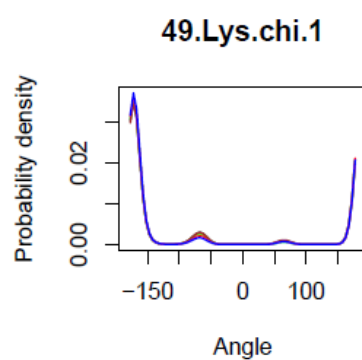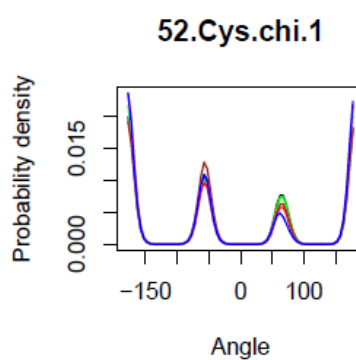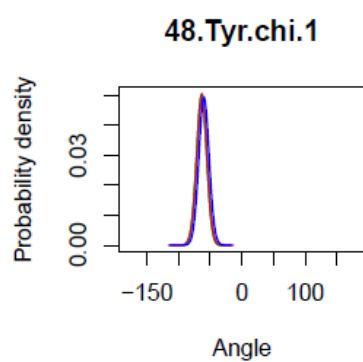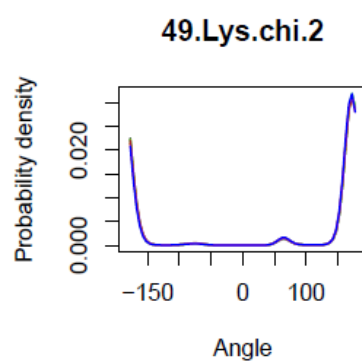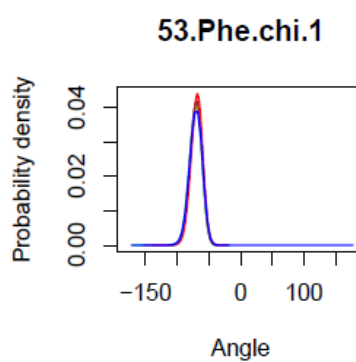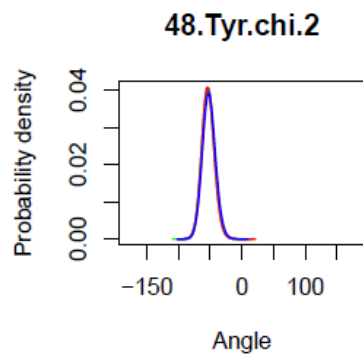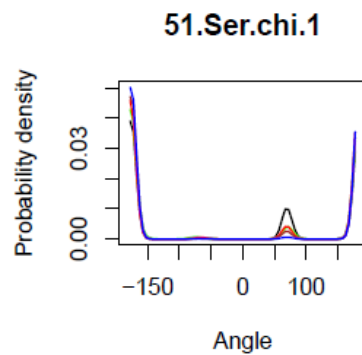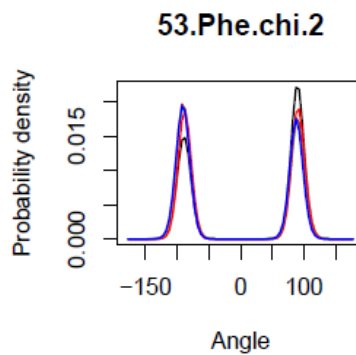

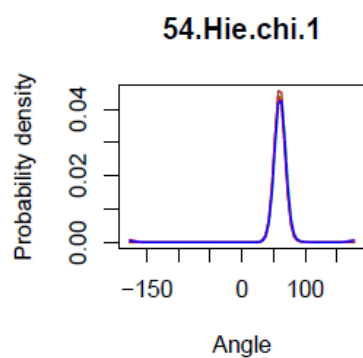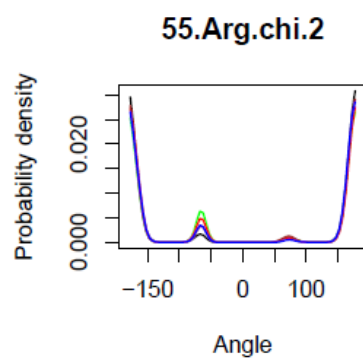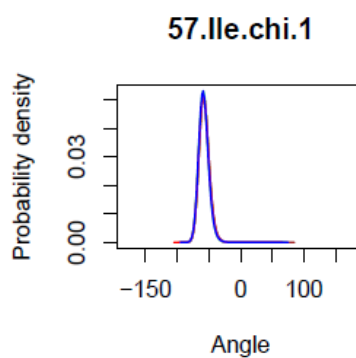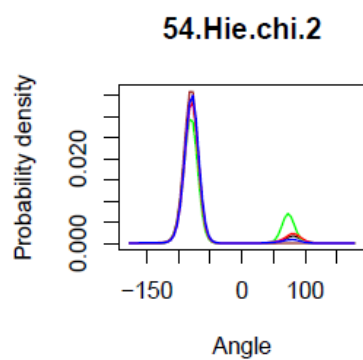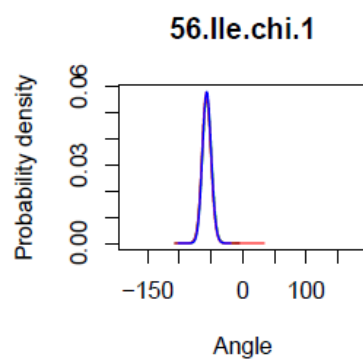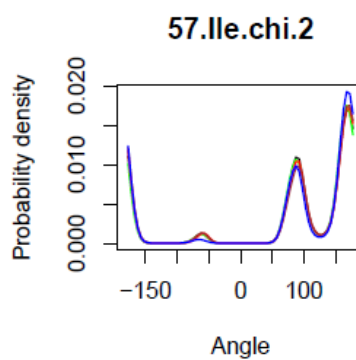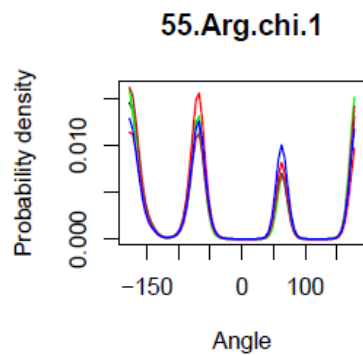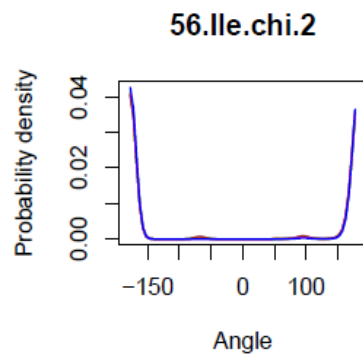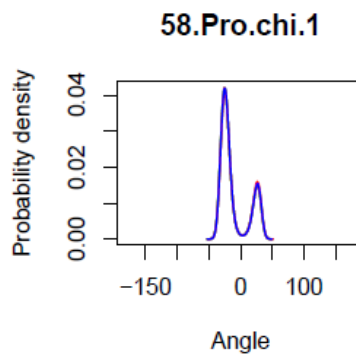

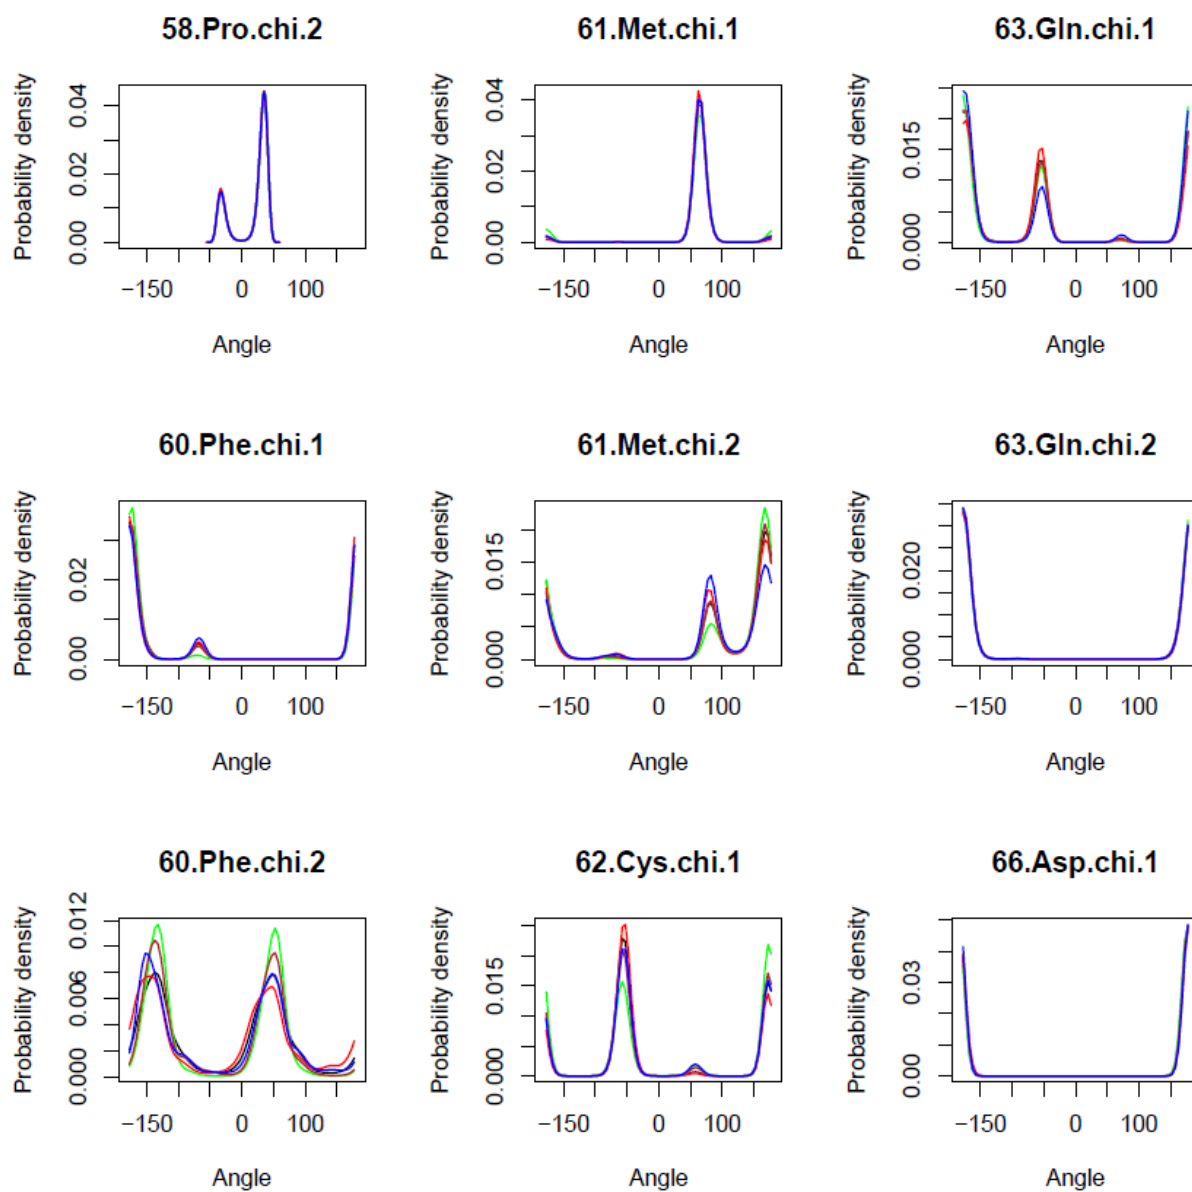

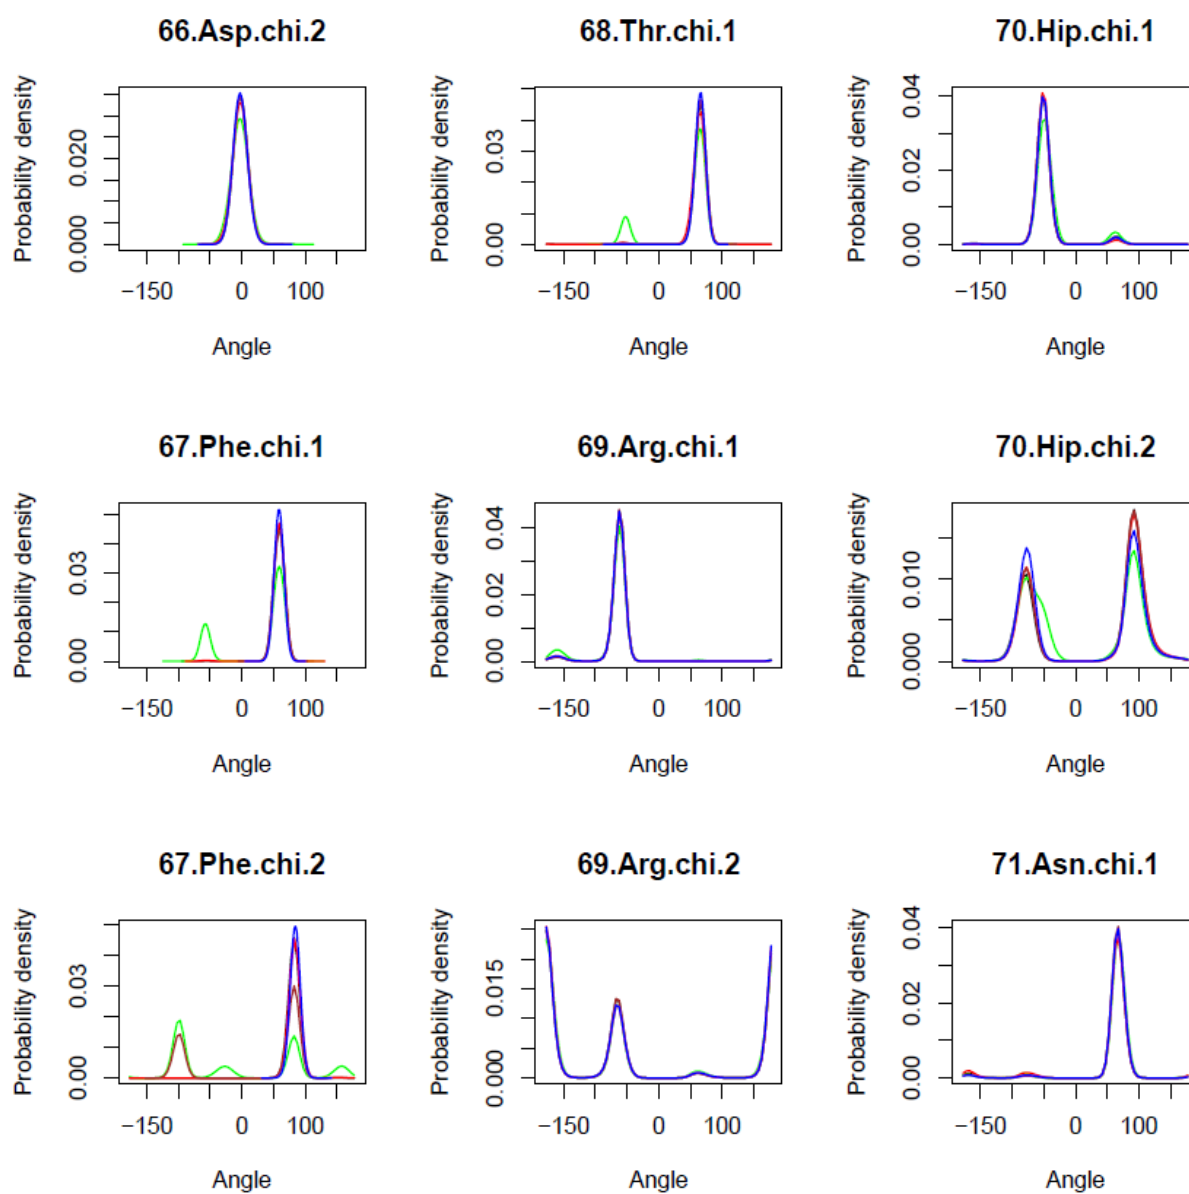

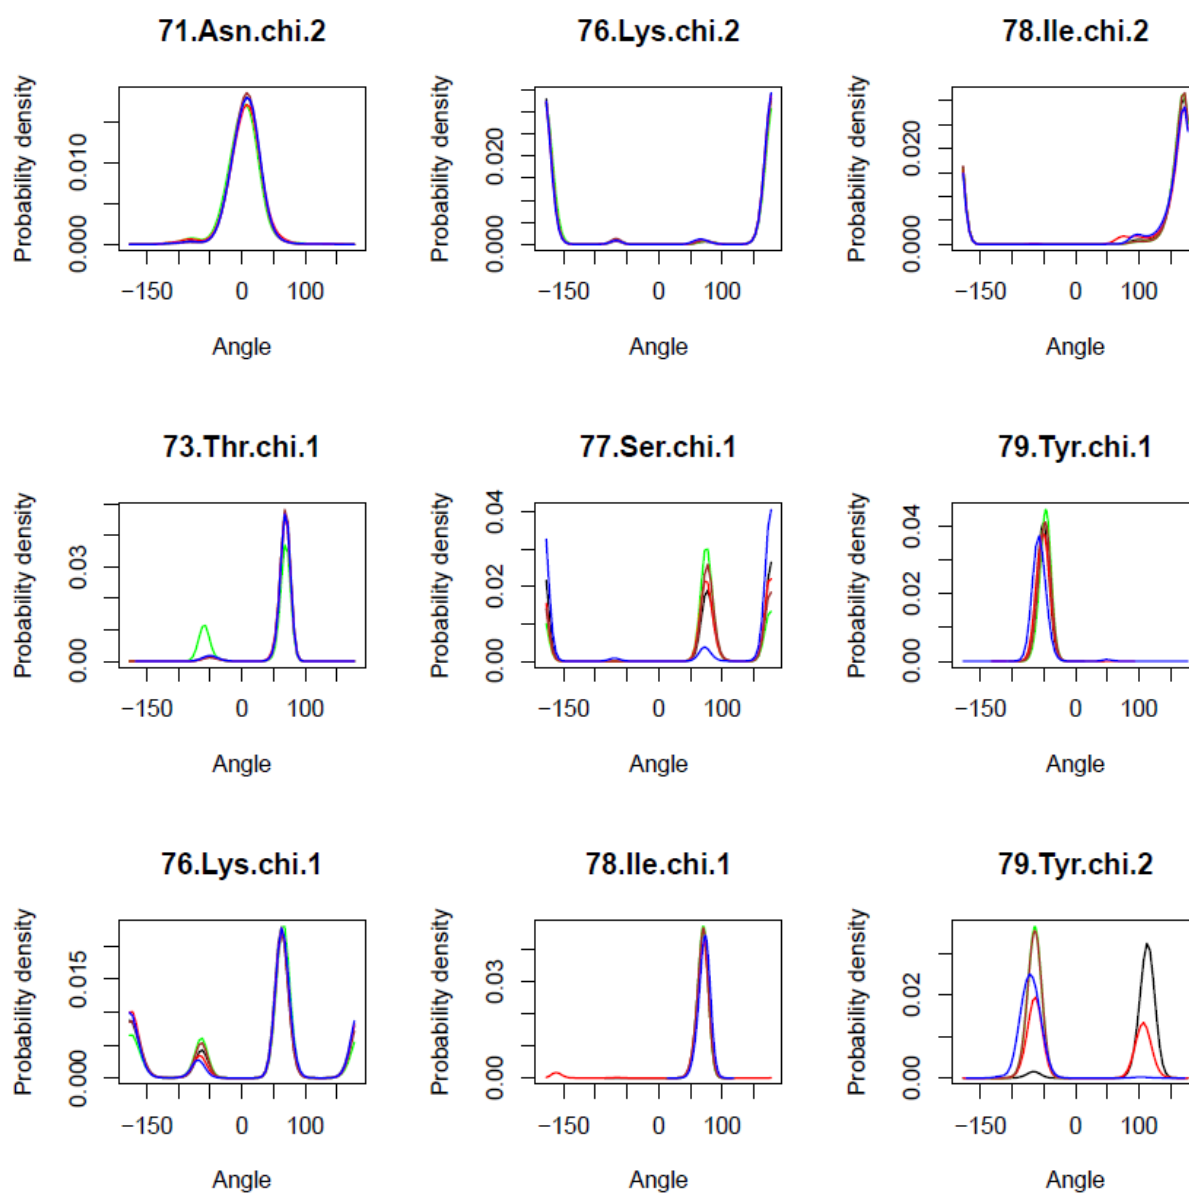

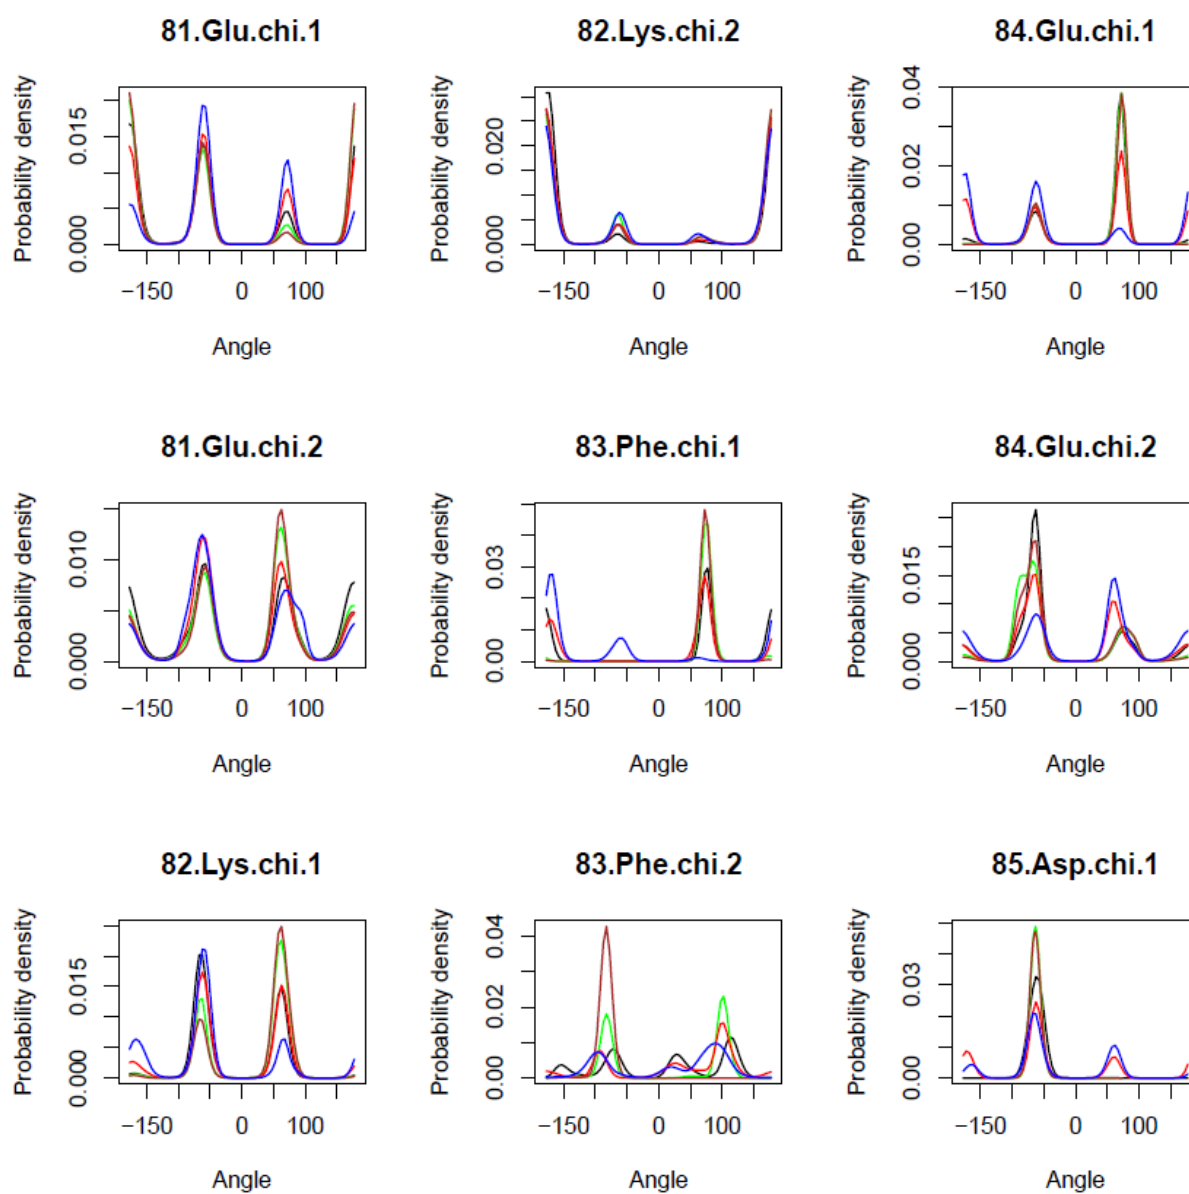

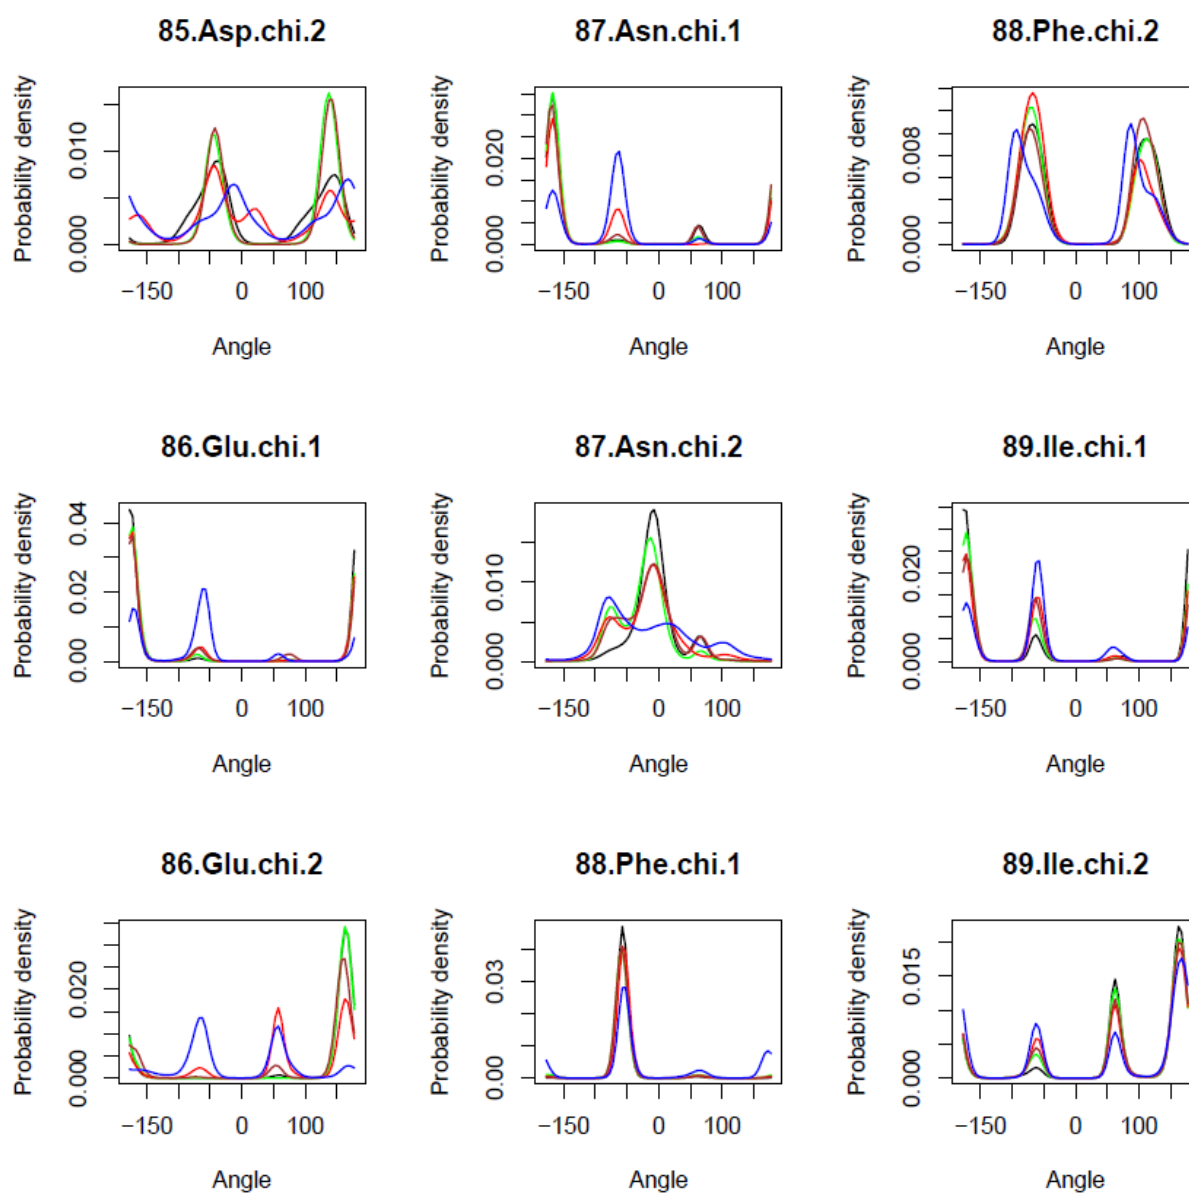

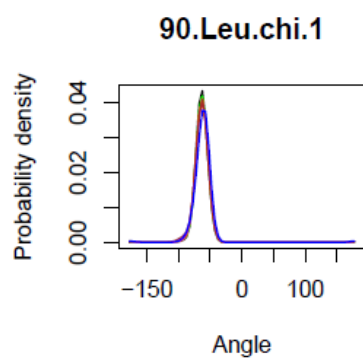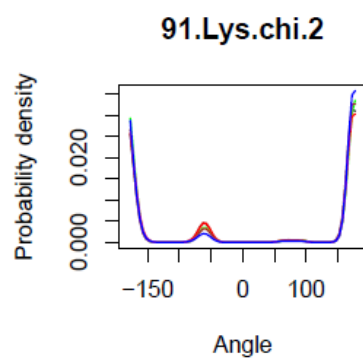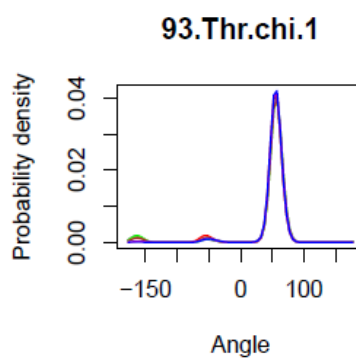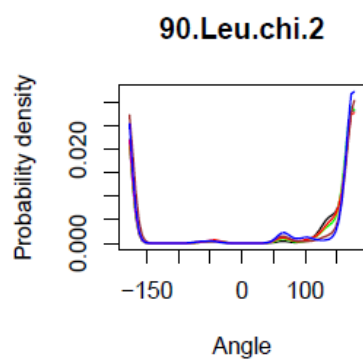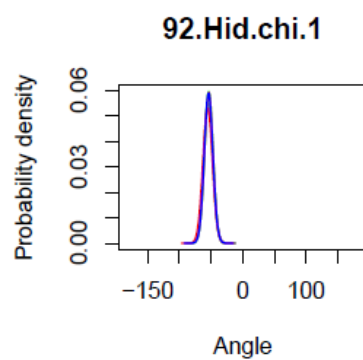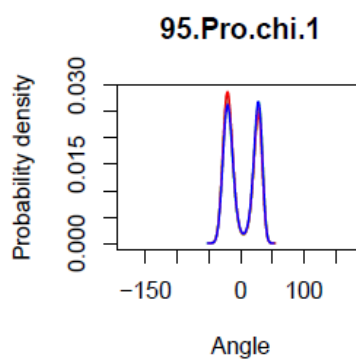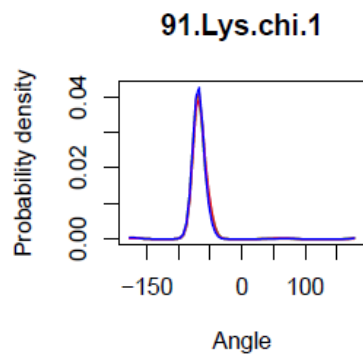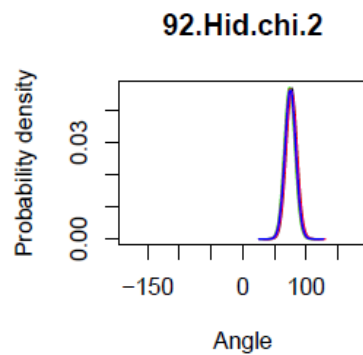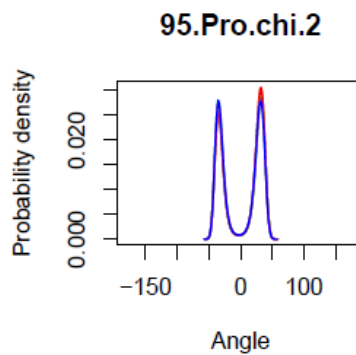



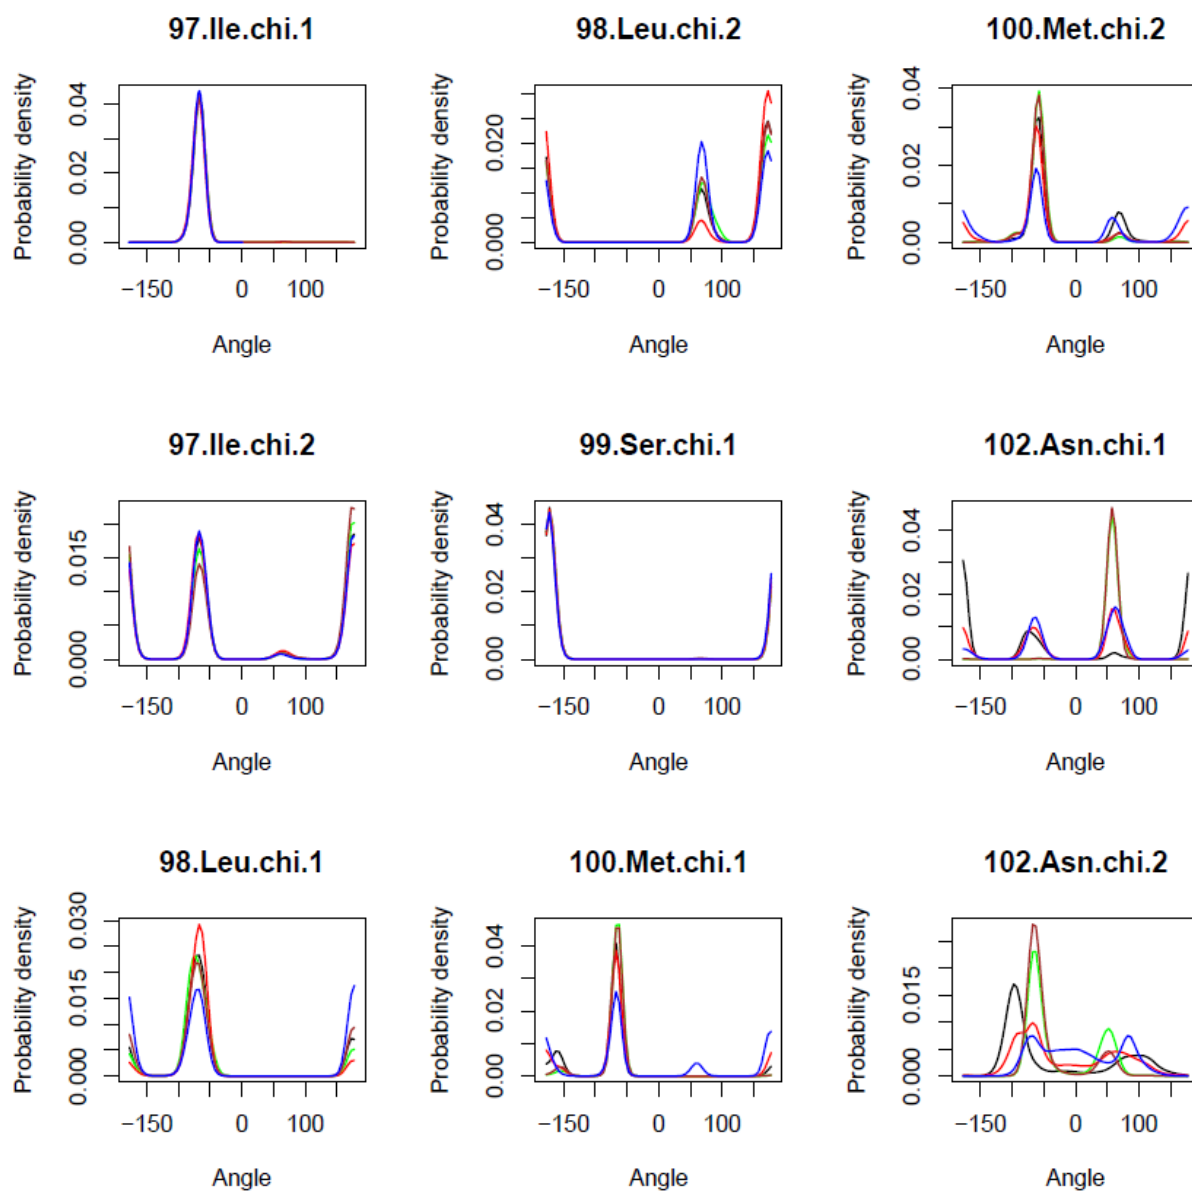

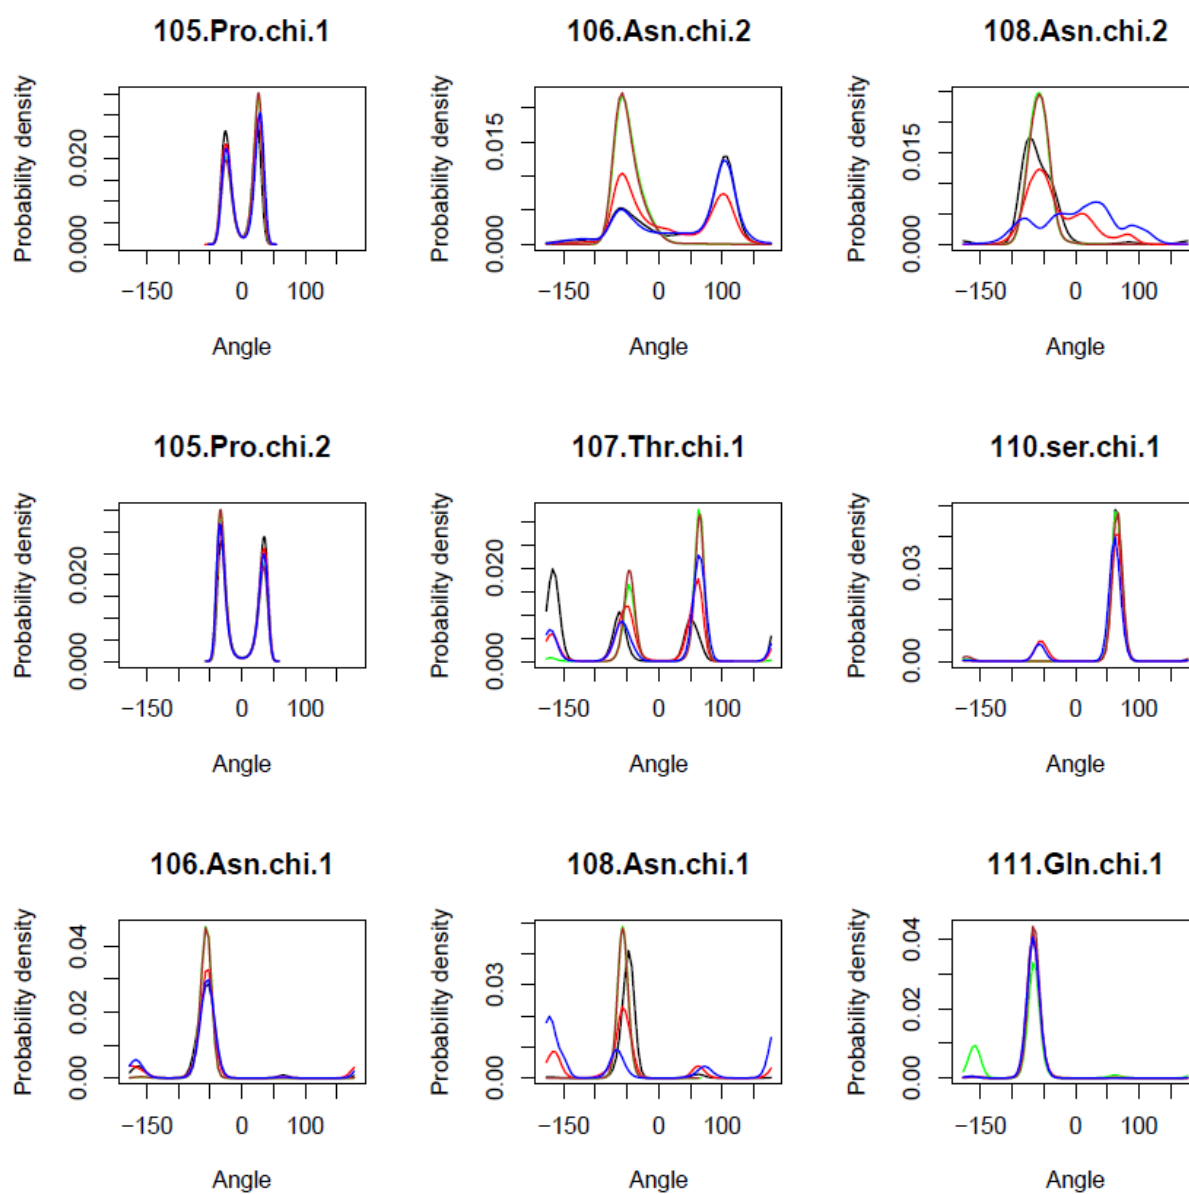

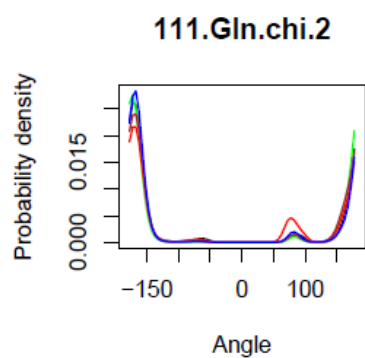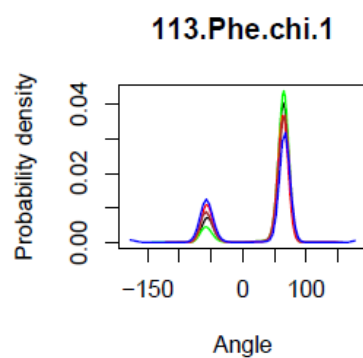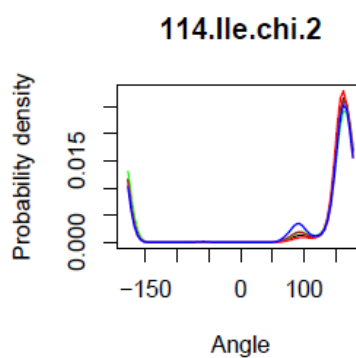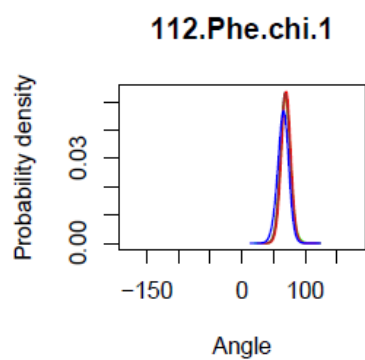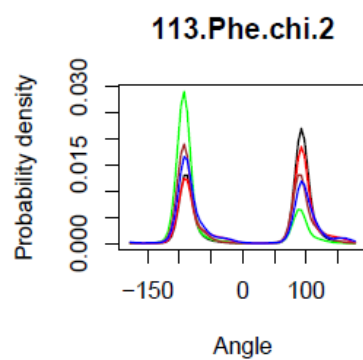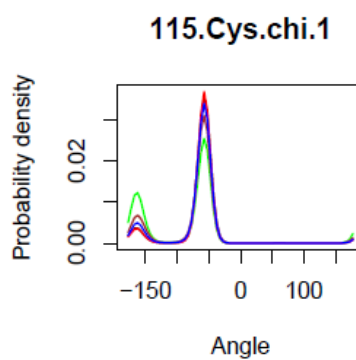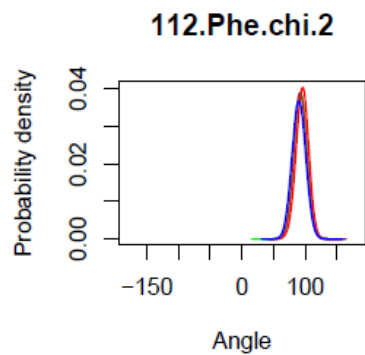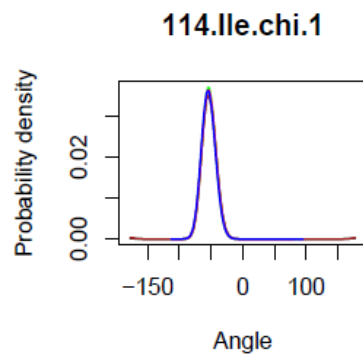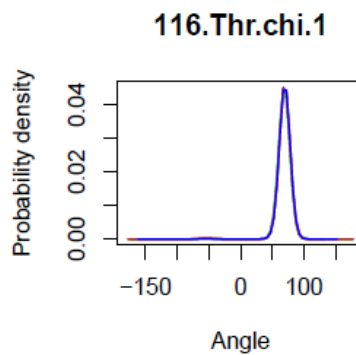

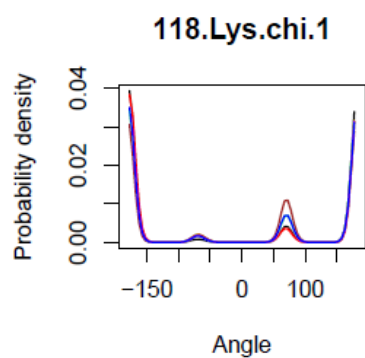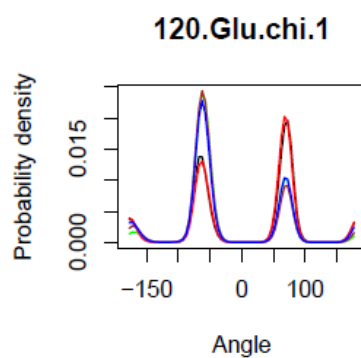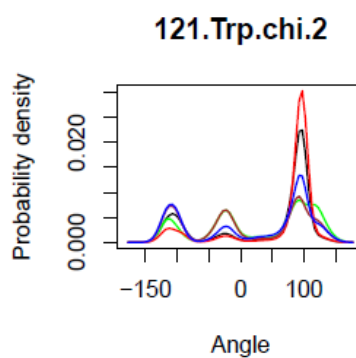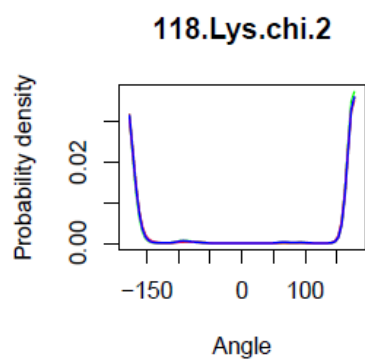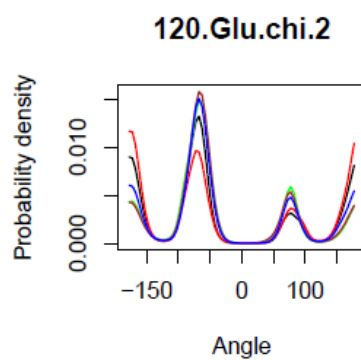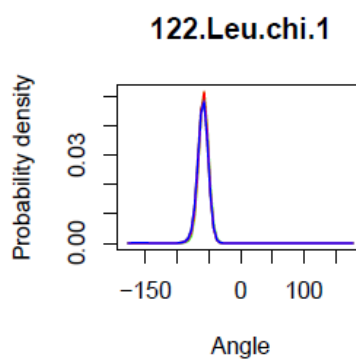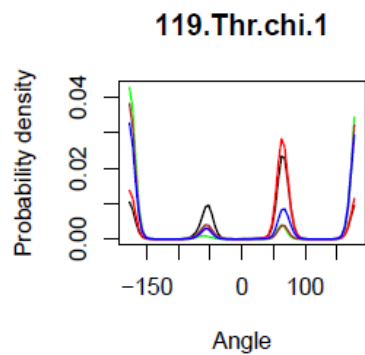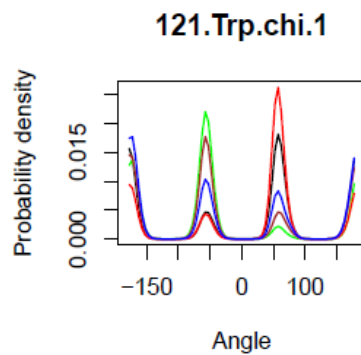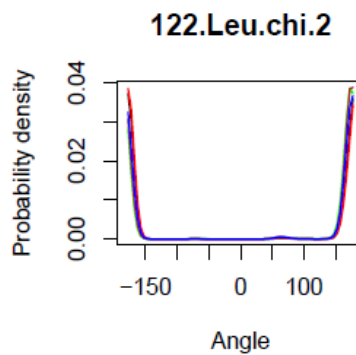

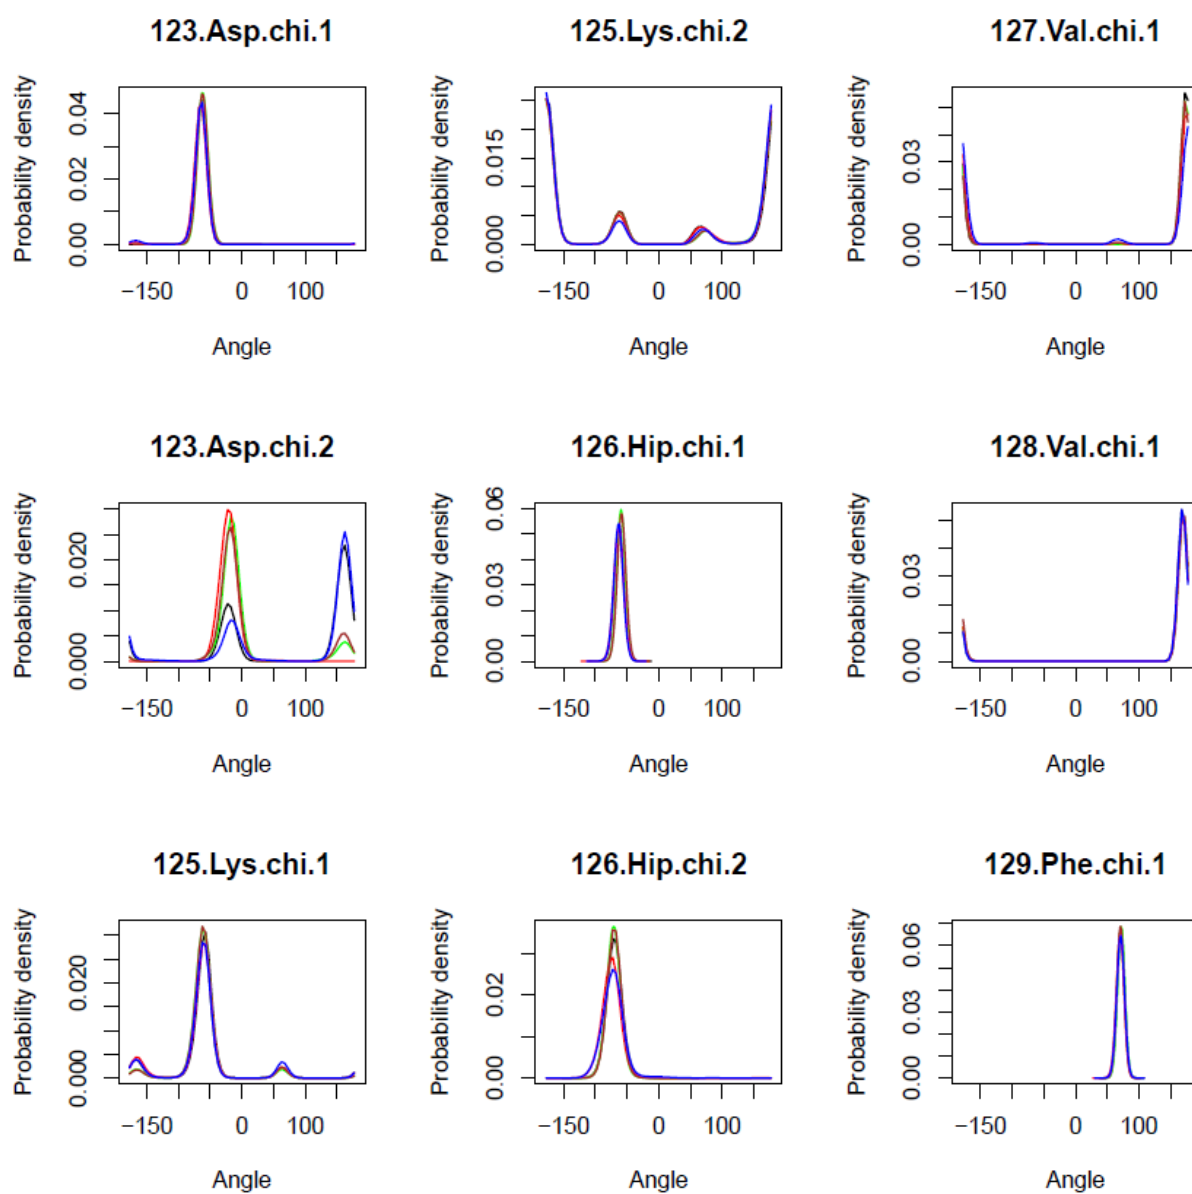

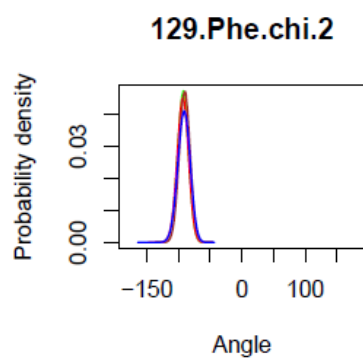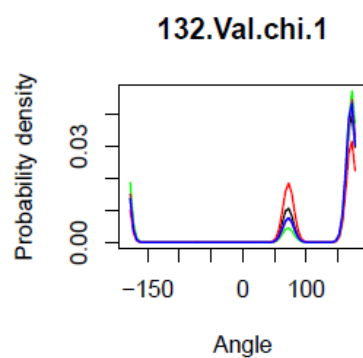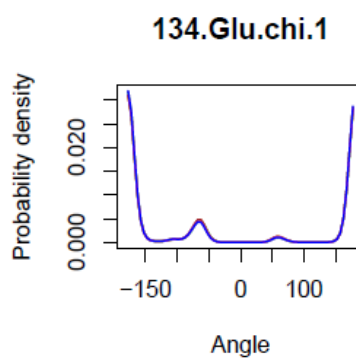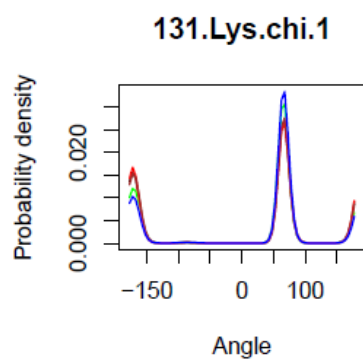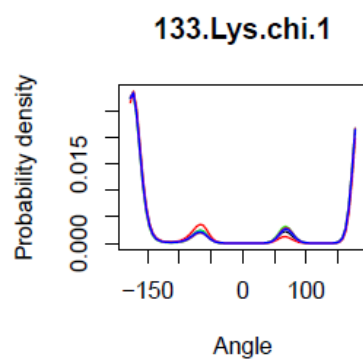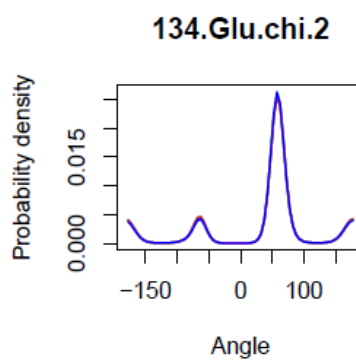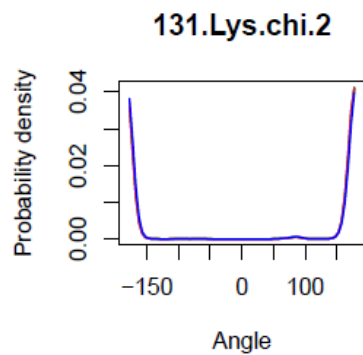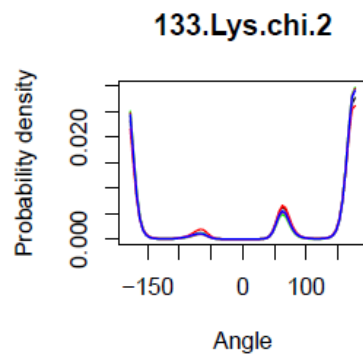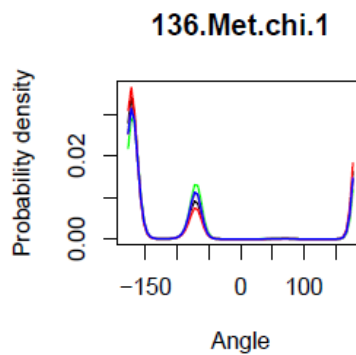

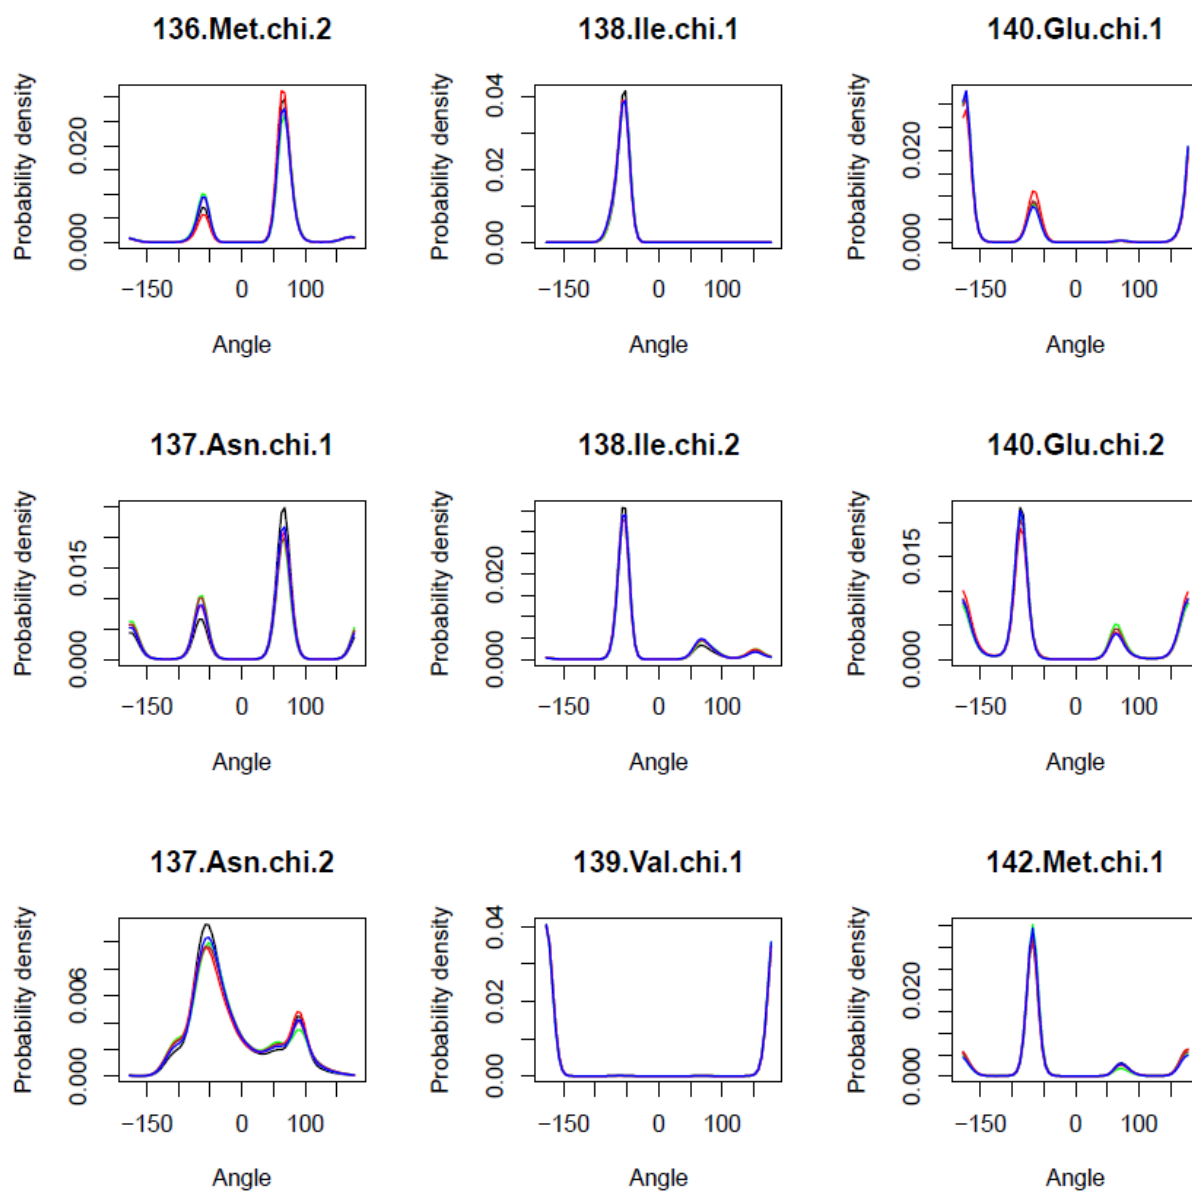

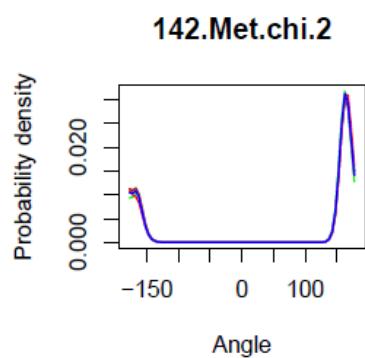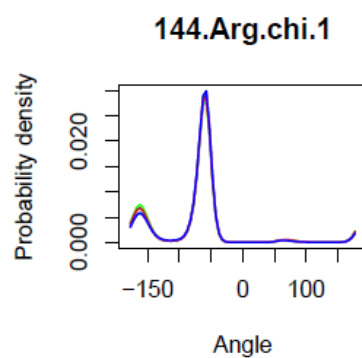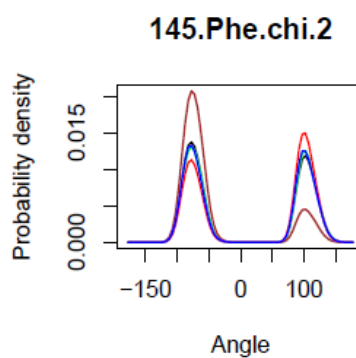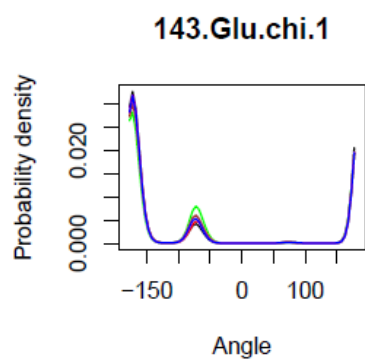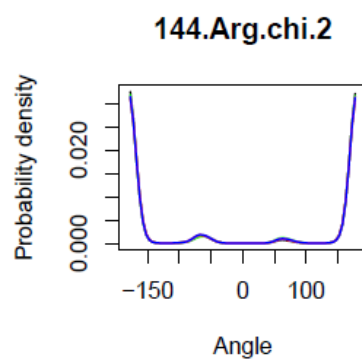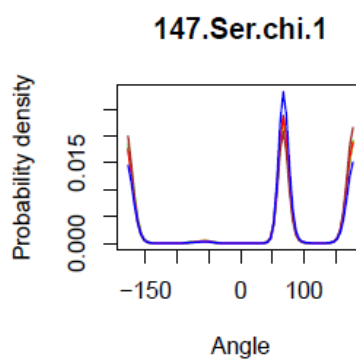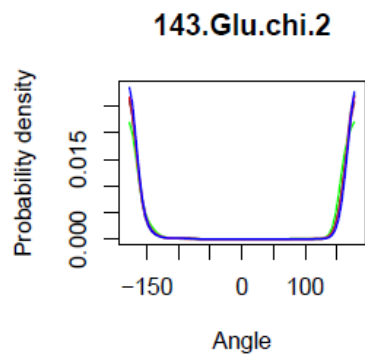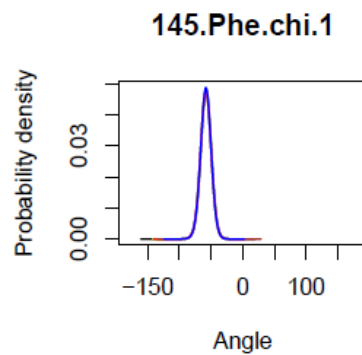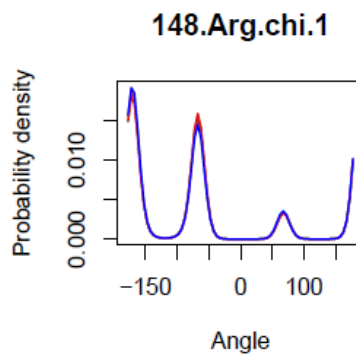



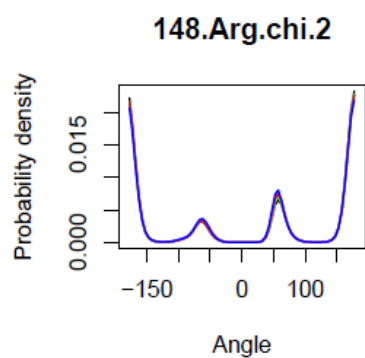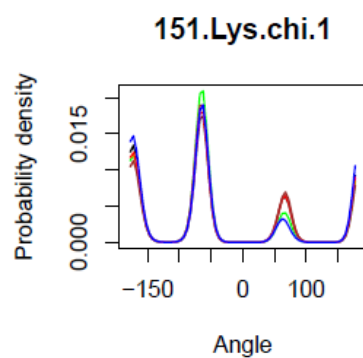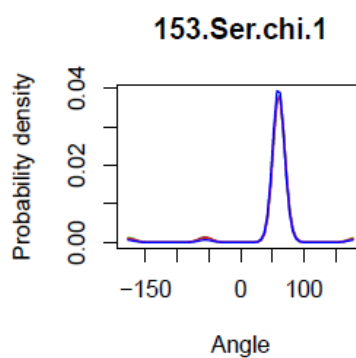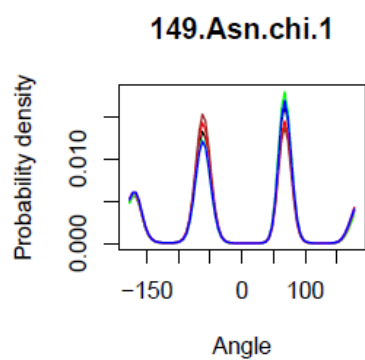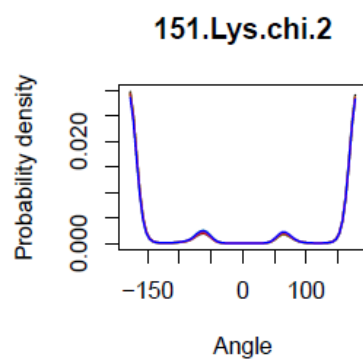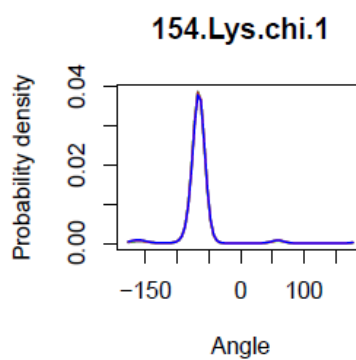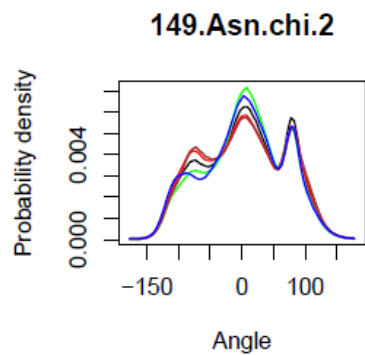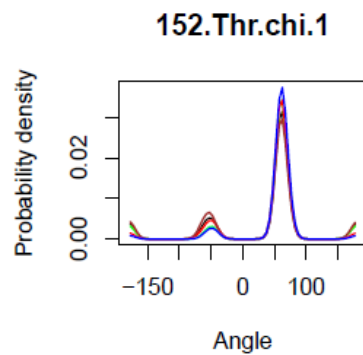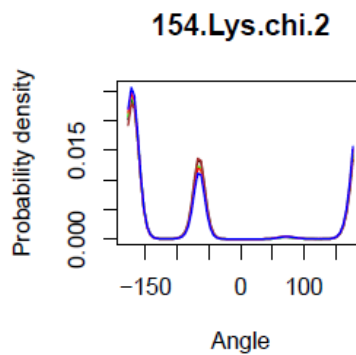

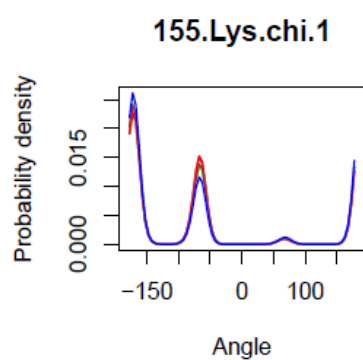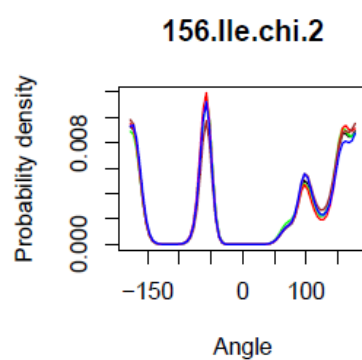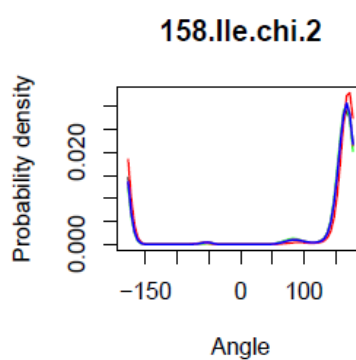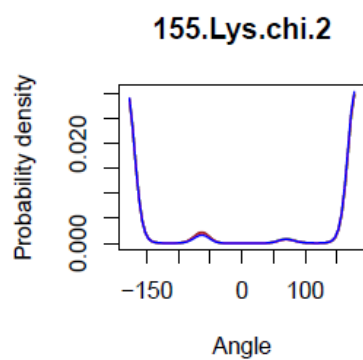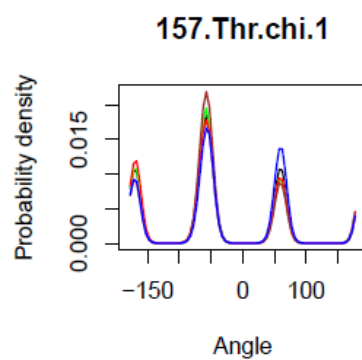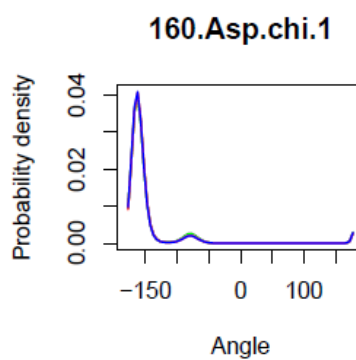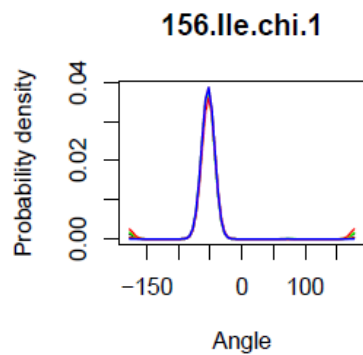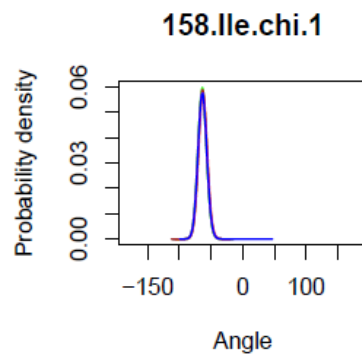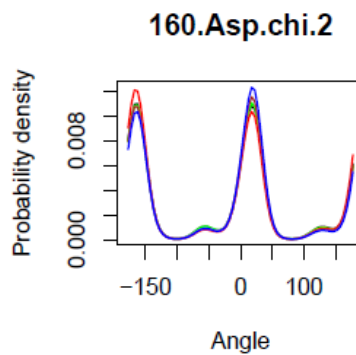

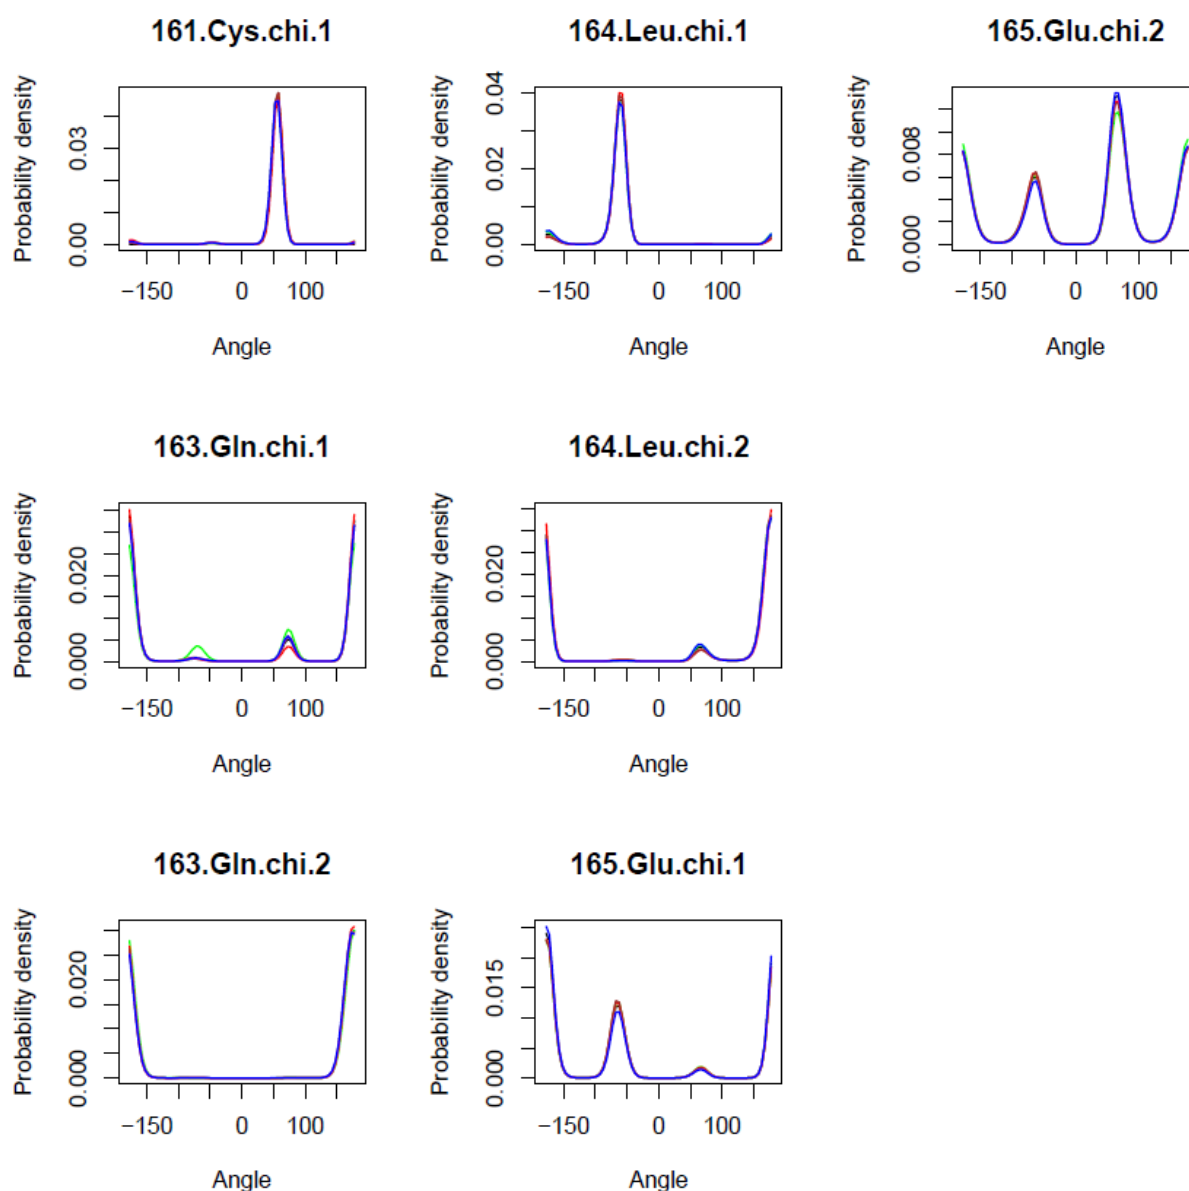

**Figure S1. Probability density distributions of the side chain torsional angles of all CypA residues except for glycines and alanines.** Depicted are the  $\chi$  torsion angles derived from the five simulations performed: wild-type (black), V6I (red), V6T (green), V29L (blue), and V29T (brown). Each panel shows an angle of a specific residue.

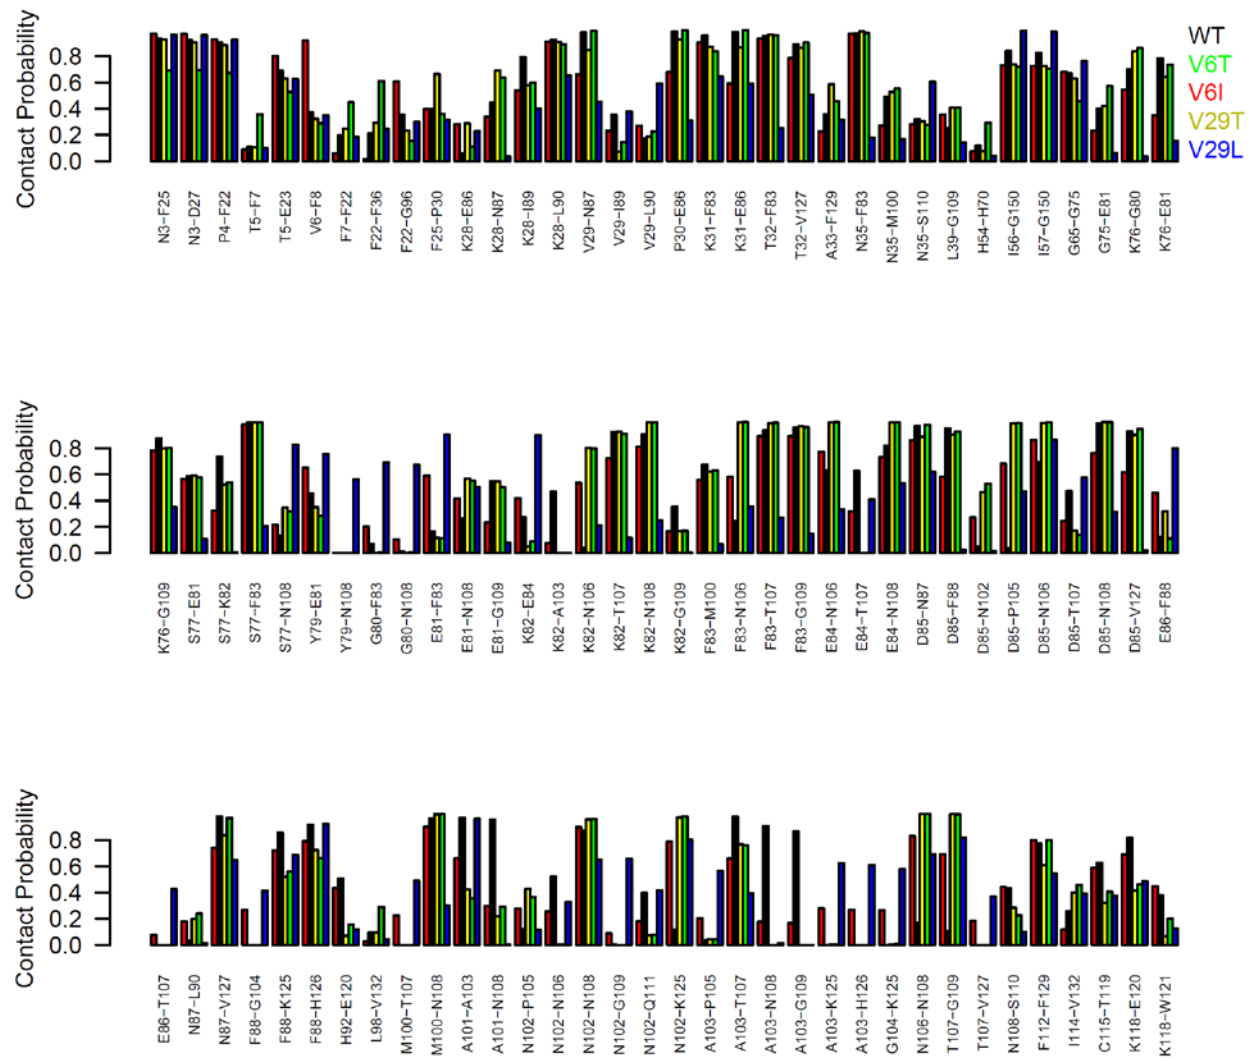

**Figure S2. Formation probabilities of all dynamic contacts during simulations.** Wild-type (black), V6I (red), V6T (green), V29L (blue), and V29T (yellow).
